# Supplementary material for: Correlation between hematological indicators in acclimatized high-altitude individuals and acute mountain sickness
Source: PeerJ. 2024 Dec 16;12:e18738. doi: 10.7717/peerj.18738 (PMC11657198; doi:10.7717/peerj.18738)
Supplement: Supplemental Information 1 [file peerj-12-18738-s001.xlsx]

## Sheet: Plain
NO.	Gender	RBC	HGB	HCT（%）	SPO2	Symptoms of acute mountain sickness	score	type of AMS	height	weight	BMI
X0010001KZ	male	4.54	146	41.2	93	moderate headache	11	moderate	173.6	67.7	22.4641
X0010002KZ	male	4.91	158	47.5	96	mild	5	mild	168.2	67.1	23.7176
X0010005KZ	male	4.9	160	46.7	98	none	0	none	178	73.4	23.1663
X0010006KZ	female	5.53	164	49.8	97	none	0	none	167.8	57.6	20.4568
X0010007KZ	female	5.25	163	48.7	97	none	0	none	180.2	59.6	18.3543
X0010008KZ	male	5.05	156	45.9	96	mild headache	8	mild	173	65.2	21.7849
X0010009KZ	male	4.68	148	43.8	97	none	0	none	170.8	63.7	21.8355
X0010010KZ	male	4.96	155	45.5	96	none	0	none	168.5	67.8	23.8798
X0010012KZ	female	4.73	151	45.4	97	none	0	none	168.9	62.6	21.944
X0010016KZ	male	4.82	154	45.4	96	none	0	none	174.7	64.7	21.1992
X0010022KZ	female	4.96	142	44.9	97	severe headache for seven days	16	severe	180.1	66.2	20.4094
X0010027KZ	female	4.72	152	45.5	97	none	0	none	181.3	67.9	20.6573
X0010030KZ	male	4.82	140	43.2	97	none	0	none	170.7	71.6	24.5723
X0010033KZ	male	4.5	133	39.9	96	none	0	none	162.5	58.1	22.0024
X0010034KZ	male	4.67	149	43.6	96	mild headache	5	mild	164.6	58.7	21.666
X0010036KZ	female	4.88	154	47.7	98	severe headache,nausea and vomiting,insomnia,chest tightness	20	severe	174.2	62.1	20.4642
X0010042KZ	male	5.04	149	44.7	97	none	0	none	169.9	65.4	22.6564
X0010043KZ	male	5.03	145	43.2	96	none	0	none	168.5	65.4	23.0345
X0010044KZ	female	4.9	145	42.4	95	none	0	none	166	58.8	21.3384
X0010045KZ	male	4.99	158	46.8	95	dyspnea, cyanosis of the lips	15	moderate	167.2	62	22.1778
X0010046KZ	female	4.73	151	45.7	97	none	0	none	169.9	70.7	24.4925
X0010048KZ	male	4.24	142	41.8	97	none	0	none	164.1	62.6	23.2465
X0010049KZ	male	4.75	145	41.4	98	none	0	none	179	66.3	20.6922
X0010051KZ	female	5.1	161	47.7	97	mild headache	5	mild	178.3	65.9	20.7292
X0010053KZ	female	4.98	149	45.4	96	none	0	none	171.8	57.4	19.4476
X0010055KZ	female	5.44	168	51.1	96	severe headache,nausea and vomiting,insomnia,chest tightness	16	severe	178.4	62.1	19.512
X0010058KZ	male	5.31	156	48.2	96	none	0	none	175.8	72.4	23.4261
X0010060KZ	male	5.12	155	46.5	97	none	0	none	169.6	57.7	20.0597
X0010061KZ	female	5.09	155	46.4	97	mild headache,insomnia	9	mild	167.7	59.3	21.0857
X0010062KZ	male	5.52	168	50.3	97	none	0	none	166.8	57.4	20.631
X0010063KZ	male	5	152	44.1	97	none	0	none	172.5	57.9	19.4581
X0010064KZ	male	4.68	151	43.6	97	mild headache	5	mild	175.4	66.6	21.6479
X0010065KZ	female	5.15	155	46	97	none	0	none	176.7	62.3	19.9533
X0010067KZ	male	5.03	153	46.4	96	mild headache	5	mild	172.6	73.6	24.7056
X0010069KZ	male	5.28	167	49.6	93	severe headache,nausea and vomiting,insomnia,chest tightness	18	severe	177.9	60.9	19.2427
X0010070KZ	female	5.28	163	47.4	96	severe headache,nausea and vomiting,insomnia,dyspnea	18	severe	176	76.3	24.632
X0010071KZ	male	5.27	156	45.8	96	moderate headache,dyspnea	11	moderate	173.1	70.8	23.6287
X0010074KZ	female	4.66	148	43.1	97	none	0	none	172.5	68.2	22.9196
X0010085KZ	female	4.99	155	45.5	97	none	0	none	174.8	56.4	18.4585
X0010089KZ	male	5.39	156	45.9	96	mild headache,insomnia,chest tightness	8	mild	168.9	57.2	20.051

## Sheet: 3day
NO.	RBC	HGB	HCT（%）	SPO2
X0030001KZ	5.44	172	52.3	88
X0030002KZ	5.31	171	53.7	86
X0030005KZ	5.34	172	52	87
X0030006KZ	6.13	188	57.4	88
X0030007KZ	5.18	156	50.5	84
X0030008KZ	5.37	167	51	88
X0030009KZ	5.03	161	49.6	88
X0030010KZ	5.73	174	54.9	92
X0030012KZ	4.78	153	48.4	90
X0030016KZ	5.61	177	55.3	91
X0030022KZ	5.56	162	50.3	85
X0030027KZ	4.81	159	48.7	81
X0030030KZ	5.21	156	48.4	87
X0030033KZ	5.37	164	48	/(data lost)
X0030034KZ	4.97	158	49.8	85
X0030036KZ	5.67	182	57.3	87
X0030042KZ	5.85	175	54.2	89
X0030043KZ	5.46	159	49.2	80
X0030044KZ	6.21	185	56.2	84
X0030045KZ	5.26	169	51.9	88
X0030046KZ	5.23	169	52.1	92
X0030048KZ	5.2	178	53.5	89
X0030049KZ	5.57	167	50.1	90
X0030051KZ	6.13	197	59.2	90
X0030053KZ	5.45	169	51	88
X0030055KZ	6.01	192	59.7	90
X0030058KZ	5.81	174	54.2	88
X0030060KZ	5.68	174	52.8	88
X0030061KZ	5.73	174	53.4	86
X0030062KZ	6.01	188	55.6	91
X0030063KZ	5.45	163	50	90
X0030064KZ	4.81	155	46.5	83
X0030065KZ	6.07	193	57	84
X0030067KZ	5.72	175	54.2	79
X0030069KZ	5.65	180	55.2	82
X0030070KZ	6.46	197	58.5	86
X0030071KZ	5.84	167	51.9	88
X0030074KZ	5.37	170	52.2	93
X0030085KZ	5.96	181	56.8	92
X0030089KZ	5.98	173	53.5	90

## Sheet: 7day
NO.	RBC	HGB	HCT（%）
X0070001KZ	5.8	181	58.7
X0070002KZ	5.31	170	57.5
X0070005KZ	5.47	174	55
X0070006KZ	6.43	194	61.8
X0070007KZ	5.52	167	55.7
X0070008KZ	5.64	175	57
X0070009KZ	5.33	169	54.4
X0070010KZ	5.7	172	56
X0070012KZ	5.17	169	55.4
X0070016KZ	5.39	172	55.1
X0070022KZ	5.82	170	54.9
X0070027KZ	4.85	158	50.7
X0070030KZ	5.34	157	52.1
X0070033KZ	4.87	150	47.1
X0070034KZ	5.12	166	55.6
X0070036KZ	5.3	171	53.1
X0070042KZ	5.25	162	51.5
X0070043KZ	5.28	161	50.7
X0070044KZ	5.74	172	53.1
X0070045KZ	5.49	181	58
X0070046KZ	5.08	161	52.3
X0070048KZ	5.2	179	54.5
X0070049KZ	5.45	166	53.6
X0070051KZ	5.44	173	54.6
X0070053KZ	5.3	163	53.1
X0070055KZ	6.05	201	69
X0070058KZ	5.83	179	58.4
X0070060KZ	5.79	178	56.7
X0070061KZ	5.78	179	57.1
X0070062KZ	2.89	185	28.9
X0070063KZ	5.59	162	52.5
X0070064KZ	5.38	169	54
X0070065KZ	6.07	185	59.4
X0070067KZ	5.85	179	59.6
X0070069KZ	5.62	182	59.5
X0070070KZ	6.99	208	58.8
X0070071KZ	6.41	184	59.4
X0070074KZ	5.42	169	55.4
X0070085KZ	5.92	182	57.9
X0070089KZ	5.81	172	53

## Sheet: 30day
NO.	RBC	HGB	HCT（%）	SPO2
X030001KZ	5.54	178	51	91
X030002KZ	5.84	191	56	87
X030005KZ	5.41	179	50.7	/(data lost)
X030006KZ	6.2	192	54.6	92
X030007KZ	5.68	176	51.7	/(data lost)
X030008KZ	5.71	176	51.4	92
X030009KZ	5.51	179	51.7	90
X030010KZ	5.37	167	48.9	93
X030012KZ	4.68	153	44.8	86
X030016KZ	5.43	178	51.3	92
X030022KZ	5.14	150	44.3	89
X030027KZ	5.33	175	49.7	92
X030030KZ	5.54	165	49.4	85
X030033KZ	5.27	165	46.1	90
X030034KZ	5.19	165	48.9	90
X030036KZ	5.11	170	47.6	94
X030042KZ	5.5	165	47.7	88
X030043KZ	6.5	190	54.4	87
X030044KZ	5.88	179	49.9	95
X030045KZ	5.38	173	49.8	87
X030046KZ	5.07	164	47.3	90
X030048KZ	5.01	172	48.4	86
X030049KZ	5.66	173	48.8	92
X030051KZ	5.72	182	52.1	92
X030053KZ	5.44	168	48.7	95
X030055KZ	6	194	57.5	93
X030058KZ	5.93	182	52.5	90
X030060KZ	5.9	183	53.2	91
X030061KZ	5.72	179	51.8	91
X030062KZ	6	189	52.3	91
X030063KZ	5.83	180	51	93
X030064KZ	4.83	155	44.1	91
X030065KZ	5.79	178	51.1	90
X030067KZ	5.54	172	50	92
X030069KZ	5.55	182	52.1	89
X030070KZ	5.81	181	50	87
X030071KZ	5.84	171	49	88
X030074KZ	5.51	175	50.8	88
X030085KZ	5.9	181	52.6	91
X030089KZ	5.9	172	48.8	91
